# Supplementary material for: Sex Differences in the Efficacy of Mediterranean Diet Treatment: A Nutrigenomics Pilot Study
Source: MDPI journal article supplement (doi:10.3390/genes14111980), 2023-10-24
Supplement: s1 [file s1]

**Table S1.** DXA parameter differences between females and males before MedD treatment.

|                              | Females               | Males               | <i>p</i> -value |
|------------------------------|-----------------------|---------------------|-----------------|
| Android Total Fat Tissue (%) | 33.90 ± 9.97          | 22.71 ± 14.58       | 0.08            |
| Android Total Fat Tissue (g) | 1425.10 ± 750.07      | 1253.67 ± 1110.65   | 0.7             |
| Gynoid Total Fat Tissue (%)  | 40.57 ± 6.18          | 22.78 ± 8.14        | 0.0001***       |
| Gynoid Total Fat Tissue (g)  | 4064.10 ± 1290.56     | 2483.83 ± 1067.39   | 0.025*          |
| Total Fat Tissue (%)         | 35.27 ± 6.44          | 21.51 ± 8.60        | 0.003**         |
| Total Fat Tissue (g)         | 18201.70 ± 6776.74    | 15841.83 ± 7753.28  | 0.53            |
| Android Total Fat Region (%) | 32.64 ± 10.11         | 22.51 ± 14.49       | 0.1             |
| Gynoid Total Fat Region (%)  | 39.73 ± 6.17          | 22.20 ± 8.01        | 0.0001***       |
| Total Fat Region (%)         | 33.99 ± 6.33          | 20.70 ± 8.33        | 0.003**         |
| Android Tissue (g)           | 3962.30 ± 1006.95     | 4959.00 ± 1178.54   | 0.9             |
| Gynoid Tissue (g)            | 9885.70 ± 1831.26     | 8877.33 ± 4394.32   | 0.52            |
| Total Tissue (g)             | 100934.00 ± 125044.32 | 71979.50 ± 7376.00  | 0.58            |
| Android Lean Mass (g)        | 2537.20 ± 368.50      | 3705.67 ± 413.54    | 0.0001***       |
| Gynoid Lean Mass (g)         | 5794.70 ± 839.92      | 8238.17 ± 704.88    | 0.0001***       |
| Total Lean Mass (g)          | 66330.50 ± 85698.90   | 47299.83 ± 23441.10 | 0.6             |

All results were expressed as mean ± standard deviation (SD). Statistical significance has been attributed to results with \**p* < 0.05, \*\**p* < 0.001, \*\*\**p* < 0.0001.

1

2

3
